# Supplementary material for: iPSC-Derived Trabecular Meshwork Cells Stimulate Endogenous TM Cell Division Through Gap Junction in a Mouse Model of Glaucoma
Source: PubMed Central journal article supplement — Invest Ophthalmol Vis Sci. 2021 Aug 24;62(10):28. doi: 10.1167/iovs.62.10.28 (PMC8399400; doi:10.1167/iovs.62.10.28), 2021-08-24
Supplement: iovs-62-10-28_s001.pdf [file iovs-62-10-28_s001.pdf]

**Figure S1**

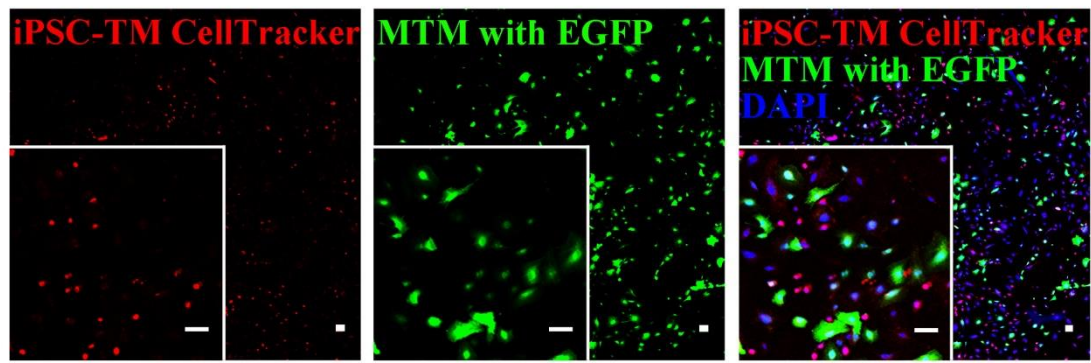

**Figure S1. CellTracker transfer analysis.** 40 $\times$  magnification images of iPSC-TM pre-stained with CellTracker Red CMTX and MTM infected with lentivirus carrying CMV-EGFP after co-culture for 48 hours. The region in the white frame shows a magnified view. CellTracker Red CMTX is detected in MTM with green fluorescence. Typical results from n=3 technical repeats are shown. Scale bar =100  $\mu$ m.

**Figure S2**

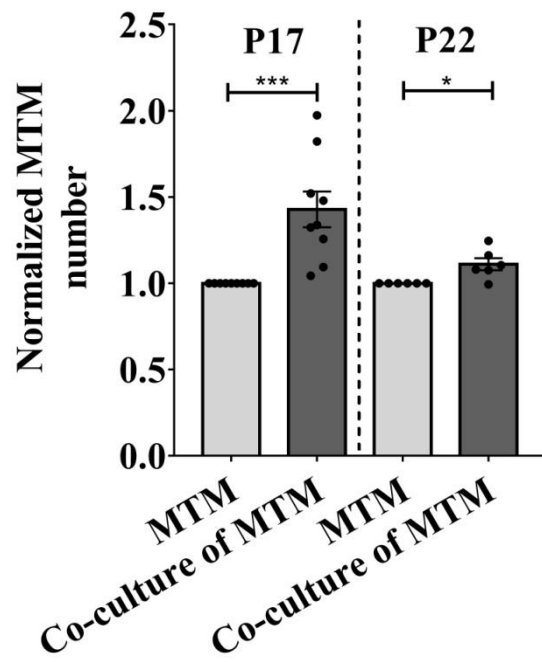

**Figure S2. iPSC-TM stimulation of MTM proliferation.** iPSC-TM stimulate proliferation of MTM at both passage 17 (n=9) and 22 (n=6), although the efficiency is lower at higher passage numbers. \* $P < 0.05$ . \*\*\* $P < 0.001$  by two-tailed t-test. Data shown are means  $\pm$  SEM.

Figure S3

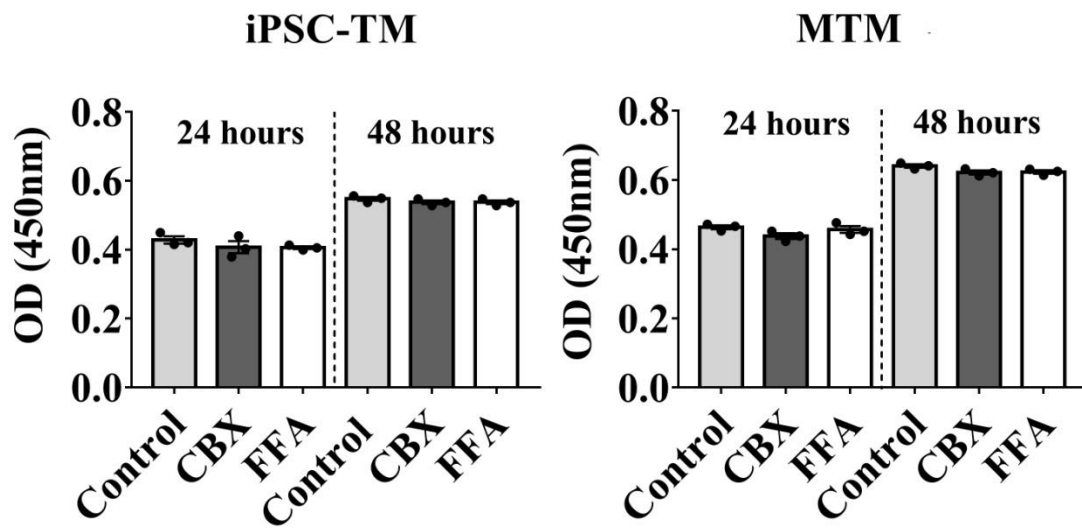

**Figure S3. Cell viability of iPSC-TM and MTM treated with CBX or FFA.** OD (450nm) readings of CCK8 tests revealed that CBX (50  $\mu$ M) or FFA (50  $\mu$ M) treatment has no toxic effect on either iPSC-TM or MTM after exposure for 24 and 48 hours. Typical results from n=3 technical repeats are shown. Statistical analysis was performed using one-way ANOVA. Data shown represent means  $\pm$  SEM.

**Figure S4**

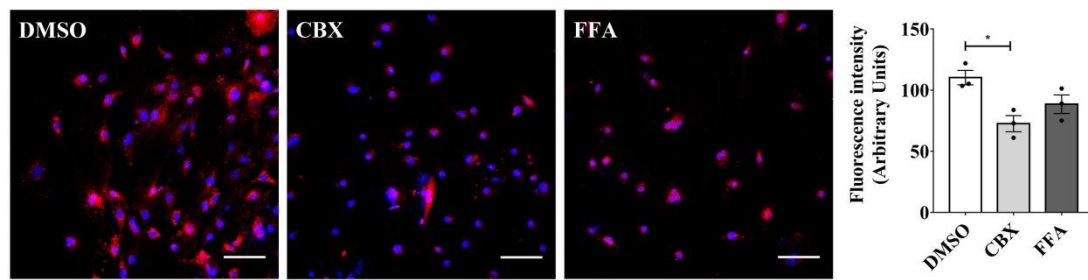

**Figure S4. Treatment with gap junction inhibitors down-regulates Cx43 expression in iPSC-TM.** iPSC-TM differentiated for 16 days are labeled with Cx43 antibody (Red). Typical results from n=3 technical repeats are shown. (Right) Quantification of Cx43 expression after CBX treatment (24 hours:  $72.6 \pm 6.6$  vs.  $110.3 \pm 5.9$ ,  $p=0.01$ ,  $n=3$ ) or FFA treatment (24 hours:  $88.5 \pm 7.6$  vs.  $110.3 \pm 5.9$ ,  $p=0.09$ ,  $n=3$ ). \* $P < 0.05$  by two-tailed t-test. Scale bar = 100  $\mu$ m. Data shown represent means  $\pm$  SEM.

**Figure S5**

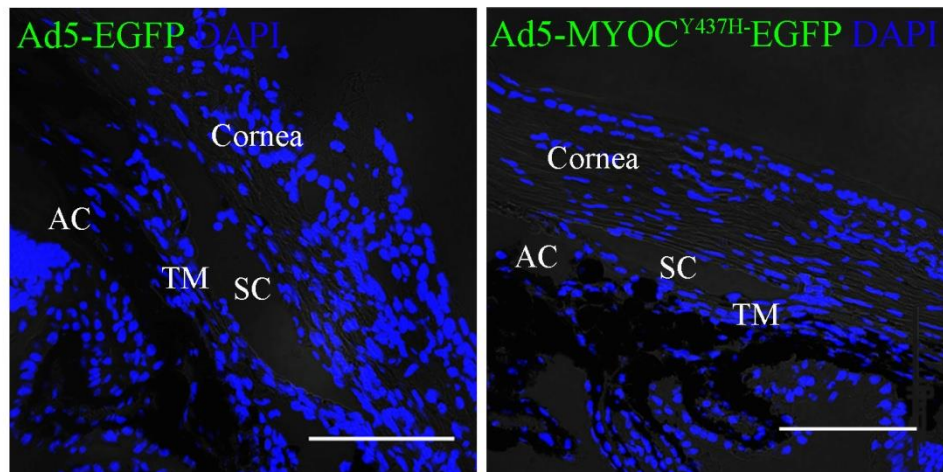

**Figure S5. Immunohistochemical detection of EGFP (green) in the anterior segment of mice having received injections of Ad5-EGFP or Ad5-MYOC<sup>Y437H</sup>-EGFP.** EGFP fluorescence was diminished two months after Ad5 injection, similar to the previously reported findings <sup>62</sup>. Scale bar = 100  $\mu$ m.

**Figure S6**

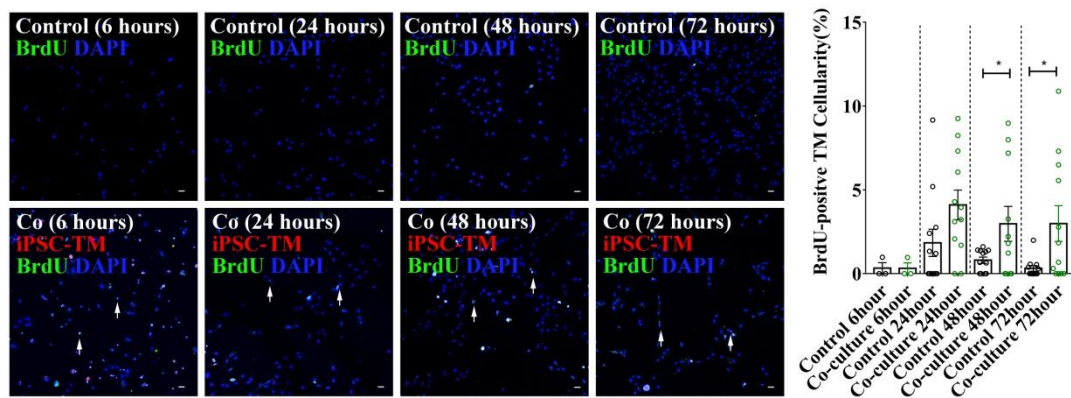

**Figure S6. BrdU incorporation analysis in the co-culture system.** (Left) 40× magnification images of iPSC-TM visualized by IHC staining with dsRed antibody (Red) and human TM cells (no fluorescence) in the co-culture system. BrdU is incorporated into dividing cells and appears green (white arrows). (Right) Quantification of BrdU-positive HTM cells after co-culture with mouse iPSC-TM for 6 ( $n=3$ ), 24 ( $n=12$ ), 48 ( $n=11-12$ ), and 72 hours ( $n=12$ ). \* $P < 0.05$  by two-tailed t-test. Scale bar = 100  $\mu\text{m}$ . Data shown are means  $\pm$  SEM. Typical results from  $n=3-12$  technical repeats are shown.

**Figure S7**

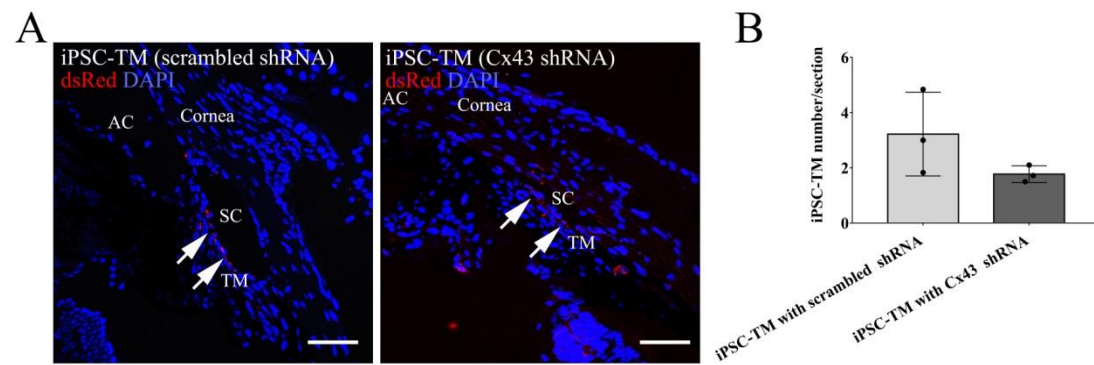

**Figure S7. iPSC-TM survival in the TM after transplantation.** (A) Detection of iPSC-TM (red) expressing Cx43 shRNA or scrambled shRNA one day after transplantation into 3-mon-old C57BL/6. (B) Quantification of iPSC-TM frequency in the TM one day after transplantation. scrambled shRNA expressing iPSC-TM cells integrate into the TM slightly better than those expressing Cx43shRNA ( $3.2 \pm 0.9$  cells/section,  $n=3$  vs.  $1.8 \pm 0.2$  cells/section,  $n=3$ ) but statistical significance is not reached ( $p=0.2$ ). Statistically analysis was performed by two-tailed t-test. Data shown represent means  $\pm$  SEM. Scale bar= 100  $\mu$ m.
